# Supplementary material for: Spatio‑temporal assessment of nutrient pollution and water quality in Lake Hashenge, Ethiopia
Source: Research Square preprint supplement (doi:10.21203/rs.3.rs-8035197/v1), 2025-11-07
Supplement: Supplementary file 1 [file e75f9264eb8da4dc4dd09b7c.docx]

**Supplementary graphs and Tables**

| Site | Sampling Point | | pH | TDS | Temp | DO | Turbidity | Chlo-a |
| --- | --- | --- | --- | --- | --- | --- | --- | --- |
| Debir | D1 | ±Sd. | 10±0.4 | 930.28±146 | 21.4±0.7 | 6.9±0.1 | 2.4±0.2 | 69.5±2.8 |
| Range | 0.8 | 276.68 | 1.37 | 0.2 | 0.42 | 5.03 |
| D2 | ±Sd. | 10.5±0.4 | 625.96±21.3 | 22.1±0.7 | 6.5±0.1 | 1.8±0.2 | 65.3±2.8 |
| Range | 0.78 | 42.27 | 1.3 | 0.2 | 0.4 | 5.03 |
| D3 | ±Sd. | 9.5±0.4 | 241±66 | 22.9±0.7 | 6.7±0.1 | 2.2±0.2 | 62±2.8 |
| Range | 0.9 | 131.32 | 1.3 | 0.2 | 0.38 | 5.03 |
| Endedo | E1 | ±Sd. | 9.1±0.4 | 906.35±67 | 22.3±0.7 | 6.1±0.1 | 0.7±0.2 | 56.4±2.8 |
| Range | 0.8 | 116 | 1.37 | 0.2 | 0.41 | 5.03 |
| E2 | ±Sd. | 9±0.4 | 530.73±168 | 21.5±0.7 | 5.9±0.1 | 1.9±0.2 | 70.6±2.8 |
| Range | 0.8 | 292.24 | 1.28 | 0.2 | 0.42 | 5.03 |
| E3 | ±Sd. | 9.01±0.5 | 182.73±48.8 | 21.5± 0.6 | 5.8±0.2 | 4.6±0.1 | 89.6±2.7 |
| Range | 0.81 | 97.44 | 1.37 | 0.2 | 0.35 | 5.03 |
| Abakiros | Ab1 | ±Sd. | 9.2±0.4 | 929.18±25.5 | 20.7±0.7 | 6±0.3 | 0.9±0.1 | 67.2±2.6 |
| Range | 0.8 | 50.36 | 1.36 | 0.16 | 0.44 | 5.03 |
| Ab2 | ±Sd. | 9±0.3 | 627±13.5 | 20.5±0.6 | 5.7±0.1 | 0.6±0.3 | 74.3±2.7 |
| Range | 0.7 | 23.34 | 1.37 | 0.2 | 0.4 | 5.03 |
| Ab3 | ±Sd. | 9.1±0.4 | 436.95±463 | 20.9±0.7 | 5.7±0.2 | 3.7±0.2 | 92.5±2.8 |
| Range | 0.75 | 809.68 | 1.37 | 0.23 | 0.39 | 5.03 |
| Adigolo | Ag1 | ±Sd. | 9.2±0.5 | 824.81±3.6 | 21.5±0.7 | 6.2±0.2 | 2±0.2 | 34.9±2.8 |
| Range | 0.8 | 7.13 | 1.4 | 0.2 | 0.36 | 5.03 |
| Ag2 | ±Sd. | 9.2±0.3 | 329.16±132 | 21.3±0.6 | 5.7±0.1 | 1.9±0.1 | 60.7±2.7 |
| Range | 0.77 | 263.67 | 1.37 | 0.21 | 0.4 | 5.03 |
| Ag3 | ±Sd. | 9.2±0.4 | 88.86±41.46 | 21.6±0.6 | 5.8±0.3 | 1.9±0.3 | 79.3±2.6 |
| Range | 0.83 | 80.87 | 1.42 | 0.2 | 0.41 | 5.03 |
| Adiminda | Am1 | ±Sd. | 9.2±0.4 | 695.17±78.9 | 21.2±0.7 | 6.4±0.1 | 0.9±0.4 | 157±2.7 |
| Range | 0.8 | 154.04 | 1.37 | 0.17 | 0.45 | 5.03 |
| Am2 | ±Sd. | 9.2±0.3 | 315.34±38.1 | 21±0.7 | 6.3±0.2 | 0.5±0.2 | 103.8±2.8 |
| Range | 0.76 | 66.31 | 1.35 | 0.2 | 0.41 | 5.03 |
| Am3 | ±Sd. | 9.1±0.5 | 304.27±59.4 | 21.±0.7 | 5.6±0.1 | 0.24±0.2 | 85.3±2.5 |
| Range | 0.8 | 118.6 | 1.43 | 0.24 | 0.44 | 5.03 |

Table SM1. Mean ± standard error and range of the physicochemical parameters in dry season for temperature in oC; pH for H+ concentration

Table SM1 2.Mean ± standard error and range of the physicochemical parameters in wet season for temperature in oC; pH for H+ concentration; Turbidity in NTU; TDS, DO and chl-a in mg/l

| Site | Sampling Point | | pH | TDS | Temp. | DO | Turbidity | Chl-a |
| --- | --- | --- | --- | --- | --- | --- | --- | --- |
| Debir | D1 | ±Sd. | 9.8±0.2 | 1130.3±146.1 | 20.65±1 | 7.3±0.1 | 2.5±0.1 | 67.1±3.1 |
| Range | 0.3 | 276.68 | 1.95 | 0.2 | 0.08 | 6.2 |
| D2 | ±Sd. | 10.3±0.2 | 776±21.3 | 21.3±1 | 6.9±0.1 | 2±0.1 | 62.9±3 |
| Range | 0.3 | 42.27 | 1.95 | 0.2 | 0.08 | 6.2 |
| D3 | ±Sd. | 9.3±0.1 | 371±66 | 22.2±1 | 7.1±0.1 | 2.3±0.2 | 59.5±2.9 |
| Range | 0.3 | 131.32 | 1.95 | 0.2 | 0.08 | 6.2 |
| Endedo | E1 | ±Sd. | 8.9±0.2 | 1156.4±67 | 21.5±1 | 6.6±0.1 | 0.8±0.1 | 53.9±2.8 |
| Range | 0.3 | 116 | 1.95 | 0.2 | 0.08 | 6.2 |
| E2 | ±Sd. | 8.8±0.3 | 770.7±168.7 | 20.7±1 | 6.4±0.1 | 2.1±0.1 | 68.1±3 |
| Range | 0.3 | 292.24 | 1.95 | 0.2 | 0.08 | 6.2 |
| E3 | ±Sd. | 8.8±0.2 | 412.7±48.8 | 20.8±1 | 6.2±0.1 | 4.8±0.1 | 87.1±3.1 |
| Range | 0.3 | 97.44 | 1.95 | 0.2 | 0.08 | 6.2 |
| Abakiros | Ab1 | ±Std. | 9.0±0.1 | 1229.2±25.5 | 20±1 | 6.4±0.1 | 1.1±0.2 | 64.7±2.5 |
| Range | 0.3 | 50.36 | 1.95 | 0.2 | 0.08 | 6.2 |
| Ab2 | ±Sd. | 8.8±0.2 | 917±13.5 | 19.7±1 | 6.1±0.1 | 0.8±0.2 | 71.8±3.1 |
| Range | 0.3 | 23.34 | 1.95 | 0.2 | 0.08 | 6.2 |
| Ab3 | ±Sd. | 8.9±0.2 | 707±463.6 | 20.1±1 | 6.1±0.1 | 3.9±0.1 | 90±3.1 |
| Range | 0.3 | 809.7 | 1.95 | 0.2 | 0.08 | 6.2 |
| Adigolo | Ag1 | ±Sd. | 9.0±0.1 | 1274.8±3.6 | 20.8±1 | 6.6±0.1 | 2.2±0.01 | 32.4±2.6 |
| Range | 0.3 | 7.13 | 1.95 | 0.2 | 0.08 | 6.2 |
| Ag2 | ±Sd. | 9.0±0.2 | 769.2±131.9 | 20.6±1 | 6.1±0.1 | 2±0.1 | 58.2±3.1 |
| Range | 0.3 | 263.67 | 1.95 | 0.2 | 0.08 | 6.2 |
| Ag3 | ±Sd. | 9.0±0.15 | 513.9±41.5 | 20.9±1 | 6.3±0.1 | 2.1±0.2 | 76.8±3.1 |
| Range | 0.3 | 80.87 | 1.95 | 0.2 | 0.08 | 6.2 |
| Adiminda | Am1 | ±Sd. | 9.0±0.3 | 1195.2±78.9 | 20.5±1 | 6.8±0.1 | 1.1±0.1 | 154.5±2.8 |
| Range | 0.3 | 154.04 | 1.95 | 0.2 | 0.08 | 6.2 |
| Am2 | ±Sd. | 9.0±0.2 | 805.3±38.1 | 20.3±1 | 6.7±0.1 | 0.7± .1 | 101.25±2.7 |
| Range | 0.3 | 66.31 | 1.95 | 0.2 | 0.08 | 6.2 |
| Am3 | ±Sd. | 8.9±0.2 | 424.3±59.4 | 20.4±1 | 6.1±0.1 | 0.4±0.2 | 82.8±3.1 |
| Range | 0.3 | 118.6 | 1.95 | 0.2 | 0.08 | 6.2 |

| Site | Sampling Point | | NH4-N | NO3-N | T-N | SRP | T-P | SiO2-Si | Fe |
| --- | --- | --- | --- | --- | --- | --- | --- | --- | --- |
| Debir | D1 | ±Sd. | 2.2±0.5 | 2.6±0.5 | 5.7±0.9 | 3.5±0.7 | 3.5±0.7 | 0.3±0.03 | 3.1±0.7 |
| Range | 1.12 | 1.1 | 2.09 | 1.53 | 1.55 | 0.04 | 1.27 |
| D2 | ±Sd. | 1.6±0.3 | 1.1±0.3 | 2.9±0.6 | 1.6±0.4 | 1.6±0.3 | 0.3±0.03 | 1.6±0.7 |
| Range | 0.75 | 0.7 | 1.28 | 0.8 | 0.77 | 0.05 | 1.27 |
| D3 | ±Sd. | 0.1±0.02 | 0.1±0.1 | 0.2±0.01 | 0.1±0.04 | 0.1±0.1 | 0.3±0.02 | 0.3±0.1 |
| Range | 0.05 | 0.05 | 0.01 | 0.08 | 0.07 | 0.03 | 0.18 |
| Endedo | E1 | ± Sd. | 3.3±0.5 | 3.9±0.8 | 8.1±1.2 | 2.6±0.4 | 2.7±0.4 | 1.7±0.2 | 5.2±0.8 |
| Range | 1.19 | 1.79 | 2.89 | 0.93 | 0.92 | 0.4 | 1.61 |
| E2 | ±Sd. | 1.2±0.1 | 2.6±0.4 | 4±0.5 | 0.7±0.1 | 0.8±0.1 | 1.3±0.3 | 1.5±0.7 |
| Range | 0.25 | 1.02 | 1 | 0.12 | 0.12 | 0.3 | 1.35 |
| E3 | ±Sd. | 0.1±0.1 | 0.1±0.1 | 0.2±0.03 | 0.1±0.01 | 0.08 | 1.5±0.21 | 1.5±0.7 |
| Range | 0.08 | 0.04 | 0.06 | 0.02 | 0.02 | 0.45 | 1.25 |
| Abakiros | Ab1 | ±Sd. | 2.5±0.6 | 3.3±0.6 | 6.2±1.03 | 2.3±0.7 | 2.4±0.7 | 1.8±0.15 | 4.4±0.7 |
| Range | 1.33 | 1.27 | 2.31 | 1.69 | 1.68 | 0.3 | 1.22 |
| Ab2 | ±Sd. | 1.5±0.5 | 2.2±0.8 | 4±1.2 | 0.9±0.2 | 0.9±0.2 | 1.6±0.11 | 2.1±1.4 |
| Range | 1.04 | 1.83 | 2.91 | 0.53 | 0.54 | 0.2 | 2.62 |
| Ab3 | ±Sd. | 0.1±0.1 | 0.1±0.1 | 0.2±0.1 | 0.1±0.02 | 0.07±0.1 | 1.5±0.06 | 0.6±0.6 |
| Range | 0.03 | 0.09 | 0.1 | 0.05 | 0.05 | 0.32 | 1.1 |
| Adigolo | Ag1 | ±Sd. | 2.8±0.6 | 2.7±0.5 | 6.4±0.9 | 2.1±0.3 | 2.2±0.3 | 2.4±0.1 | 4±1 |
| Range | 1.26 | 1.09 | 2.03 | 0.58 | 0.57 | 0.2 | 1.97 |
| Ag2 | ±Sd. | 1.4±0.3 | 1.8±0.7 | 3.4±1 | 0.5±0.1 | 0.6±0.1 | 2.6±0.11 | 2.6±0.7 |
| Range | 0.71 | 1.68 | 2.32 | 0.09 | 0.09 | 0.21 | 1.18 |
| Ag3 | ±Sd. | 0.1±0.1 | 0.1±0.01 | 0.2±0.01 | 0.2±0.01 | 0.11 | 2.5±0.13 | 1.3±07 |
| Range | 0.03 | 0.01 | 0.02 | 0.03 | 0.01 | 0.22 | 1.32 |
| Adiminda | Am1 | ±Sd. | 0.9±0.1 | 1.9±0.5 | 3.4±0.5 | 2.4±0.5 | 2.5±0.5 | 2.5±0.16 | 3.3±0.2 |
| Range | 0.17 | 1.21 | 1.07 | 1.07 | 1.08 | 0.45 | 0.46 |
| Am2 | ±Sd. | 0.5±0.1 | 0.7±0.2 | 1.5±0.3 | 0.3±0.1 | 0.4±0.1 | 2±0.13 | 1.8±0.4 |
| Range | 0.26 | 0.48 | 0.74 | 0.16 | 0.15 | 0.5 | 0.78 |
| Am3 | ±Sd. | 0.1±0.1 | 0.1±0.01 | 0.1±0.01 | 0.1±0.01 | 0.08 | 2.1±0.1 | 0.8±0.4 |
| Range | 0.03 | 0.02 | 0.03 | 0.03 | 0.02 | 0.35 | 0.85 |

Table SM1 3. Mean, mean standard error and range of nutrient concentrations (mg L−1) measured in sampling sites at Lake Hashenge in dry season (TP; SRP; NO3-N; NH4-N; T-N ; SiO2-Siand Fe)

| Site | Sampling Point | | NH4-N | NO3-N | T-N | SRP | T-P | SiO2-Si | Fe |
| --- | --- | --- | --- | --- | --- | --- | --- | --- | --- |
| Debir | D1 | ±Sd. | 1.5±0.5 | 1.5±0.3 | 3.9±0.86 | 2±0.6 | 1.8±0.7 | 1.8±0.21 | 1.5±0.7 |
| Range | 1.03 | 0.61 | 1.78 | 1.6 | 1.78 | 0.41 | 1.27 |
| D2 | ±Sd. | 0.9±0.3 | 0.7±0.2 | 1.9±0.54 | 0.8±0.2 | 0.8±0.3 | 2.1±0.2 | 0.9±0.3 |
| Range | 0.73 | 0.35 | 1.3 | 0.55 | 0.77 | 0.4 | 0.57 |
| D3 | ±Sd. | 0.1±0.01 | 0.1±0.01 | 0.1±0.05 | 0.1±0.01 | 0.1±0.01 | 2.2±0.22 | 0.3±0.1 |
| Range | 0.08 | 0.08 | 0.11 | 0.04 | 0.03 | 0.39 | 0.1 |
| Endedo | E1 | ±Sd. | 2±0.7 | 2.5±0.6 | 5.6±1.34 | 1.9±0.7 | 1.7± 0.7 | 5±0.36 | 3.7±1.3 |
| Range | 1.73 | 1.65 | 3.37 | 1.47 | 1.58 | 0.5 | 2.41 |
| E2 | ±Sd. | 1.1±0.5 | 1.5±0.5 | 2.9±0.99 | 0.7±0.1 | 0.6±0.2 | 4.3±0.3 | 0.7±0.5 |
| Range | 1.29 | 1.2 | 2.71 | 0.29 | 0.55 | 0.3 | 1 |
| E3 | ±Sd. | 0.1±0.01 | 0.1±0.01 | 0.1±0.05 | 0.1±0.01 | 0.1±0.03 | 4.5±0.25 | 0.3± 0.1 |
| Range | 0.02 | 0.1 | 0.12 | 0.07 | 0.09 | 0.4 | 0.2 |
| Abakiros | Ab1 | ±Sd. | 1.9±0.5 | 2±0.6 | 4.7±0.94 | 1.5±0.4 | 1.3±0.22 | 4.4±0.33 | 2.6± 0.6 |
| Range | 1.09 | 1.39 | 2.22 | 0.99 | 0.52 | 0.6 | 1.07 |
| Ab2 | ±Sd. | 1±0.4 | 1±0.4 | 2.3±0.78 | 0.7±0.2 | 0.7±0.2 | 4.6±0.35 | 1.3±0.21 |
| Range | 0.86 | 0.87 | 2.08 | 0.29 | 0.59 | 0.7 | 1.92 |
| Ab3 | ±Sd. | 0.02 | 0.1±0.01 | 0.1±0.02 | 0.09 | 0.1±0.03 | 3.9±0.33 | 0.3±0.1 |
| Range | 0.01 | 0.04 | 0.05 | 0.03 | 0.07 | 0.4 | 0.27 |
| Adigolo | Ag1 | ±Sd. | 1.4±0.4 | 1.4±0.5 | 3.8±0.92 | 1.6±0.3 | 1.4±0.4 | 5.5±0.63 | 2.4±0.8 |
| Range | 1.07 | 1.27 | 2.44 | 0.69 | 1.02 | 0.6 | 1.47 |
| Ag2 | ±Sd. | 0.8±0.2 | 1.2±0.3 | 2.3±0.52 | 0.5±0.1 | 0.6±0.2 | 4.3±0.62 | 0.9±0.5 |
| Range | 0.59 | 0.7 | 1.31 | 0.22 | 0.54 | 0.4 | 1.02 |
| Ag3 | ±Sd. | 0.1±0.01 | 0.1±0.01 | 0.1±0.04 | 0.15 | 0.1±0.03 | 5.2±0.55 | 0.7±0.6 |
| Range | 0.09 | 0.02 | 0.1 | 0.03 | 0.08 | 0.7 | 1.06 |
| Adiminda | Am1 | ±Sd. | 0.8±0.3 | 1±0.2 | 2.8±0.1 | 1.4±0.6 | 1.2±0.5 | 5.4±0.55 | 1.8±0.5 |
| Range | 0.54 | 0.47 | 0.24 | 1.62 | 1.26 | 0.5 | 0.84 |
| Am2 | ±Sd. | 0.54±0.1 | 0.3 ±0.1 | 1.1±0.2 | 0.3±0.1 | 0.4±0.2 | 4.3±0.5 | 1.1±0.3 |
| Range | 0.23 | 0.27 | 0.38 | 0.19 | 0.37 | 0.4 | 0.48 |
| Am3 | ±Sd. | 0.03 | 0.04±0.001 | 0.1±0.01 | 0.08 | 0.1±0.02 | 4.7±0.45 | 0.6±0.5 |
| Range | 0.03 | 0.02 | 0.04 | 0.02 | 0.05 | 0.6 | 0.96 |

Table SM1 4. Mean, mean standard error and range of nutrient concentrations (mg L−1) measured in sampling sites at Lake Hashenge in wet season (TP; SRP; NO3-N; NH4-N; T-N ; SiO2-Siand Fe)

Table SM1 5. Dry season mean value of physic-chemical parameters for five stations in Lake Hashenege

| **Site** | **Debir** | **Endodo** | **Abakiros** | **Adigolo** | **Adiminda** | **Mean** |
| --- | --- | --- | --- | --- | --- | --- |
| **pH** | 10.0 | 9.0 | 9.1 | 9.2 | 9.2 | 9.3 |
| **Turbidity (in NTU)** | 1.3 | 1.1 | 0.6 | 0.8 | 0.3 | 0.82 |
| **SD (in m)** | 0.15 | 0.19 | 0.24 | 0.21 | 0.25 | 0.21 |
| **Temp (in oC)** | 22.1 | 21.8 | 20.7 | 21.5 | 21.1 | 21.44 |
| **DO (in mg/L)** | 6.7 | 6.0 | 5.8 | 5.9 | 6.1 | 6.1 |
| **Chl-a (in mg/L)** | 65.6 | 72.2 | 78.0 | 58.3 | 115.3 | 77.88 |
| **TDS (in mg/L)** | 599.1 | 539.9 | 664.4 | 414.3 | 438.3 | 531.2 |
| **NH4-N (in mg/L)** | 1.0 | 0.7 | 0.5 | 0.1 | 0.4 | 0.54 |
| **NO3-N (in mg/L)** | 0.5 | 0.1 | 0.4 | 0.4 | 0.2 | 0.32 |
| **T-N (in mg/L)** | 9.6 | 13.9 | 7.1 | 3.8 | 3.9 | 7.66 |
| **SRP (in mg/L)** | 0.4 | 0.2 | 0.4 | 0.3 | 0.3 | 0.32 |
| **T-P (in mg/L)** | 0.7 | 0.5 | 0.2 | 0.3 | 0.3 | 0.4 |
| **SiO2-Si (in mg/L)** | 0.3 | 1.5 | 1.6 | 2.5 | 2.2 | 1.62 |
| **Fe(in mg/L)** | 0.0 | 0.4 | 0.0 | 0.3 | 0.5 | 0.24 |

| **Site** | **Debir** | **Endodo** | **Abakiros** | **Adigolo** | **Adiminda** | **Mean** |
| --- | --- | --- | --- | --- | --- | --- |
| **pH** | 9.8 | 8.9 | 8.9 | 9.0 | 9.0 | 9.12 |
| **Turbidity (in NTU)** | 2.3 | 2.5 | 1.9 | 2.1 | 0.7 | 1.9 |
| **SD (in m)** | 0.11 | 0.08 | 0.22 | 0.16 | 0.25 | 0.16 |
| **Temp (in oC)** | 21.4 | 21.0 | 19.9 | 20.7 | 20.4 | 20.68 |
| **DO (in mg/L)** | 7.1 | 6.4 | 6.2 | 6.3 | 6.5 | 6.5 |
| **Chl-a (in mg/L)** | 63.1 | 69.7 | 75.5 | 55.8 | 112.8 | 75.38 |
| **TDS (in mg/L)** | 759.1 | 779.9 | 951.0 | 852.6 | 808.3 | 830.18 |
| **NH4-N (in mg/L)** | 3.8 | 2.0 | 2.1 | 0.9 | 0.6 | 1.88 |
| **NO3-N (in mg/L)** | 0.5 | 0.1 | 0.2 | 0.1 | 0.0 | 0.18 |
| **T-N (in mg/L)** | 5.0 | 2.2 | 2.6 | 1.4 | 0.8 | 2.4 |
| **SRP (in mg/L)** | 0.4 | 0.4 | 0.1 | 0.4 | 0.2 | 0.3 |
| **T-P (in mg/L)** | 0.9 | 0.8 | 0.7 | 0.7 | 0.5 | 0.72 |
| **SiO2-Si (in mg/L)** | 2.0 | 4.6 | 4.3 | 5.0 | 4.8 | 4.14 |
| **Fe(in mg/L)** | 0.0 | 0.1 | 0.0 | 0.2 | 0.1 | 0.08 |

Table SM1 6. Wet Season mean valueof physic-chemical parameters for five stations of Lake Hashenge

Table SM1 7**.** Average rain foll and temperature of lake Hashenge (1980 – 2025)

|  | Jan | Feb | March | April | May | Jun | July | Aug | Sept | Oct |  | Nov | Dec |
| --- | --- | --- | --- | --- | --- | --- | --- | --- | --- | --- | --- | --- | --- |
| Average Rainfall | 10.59 | 8.44 | 80.61 | 85.41 | 25.55 | 210.91 | 960.41 | 780.53 | 100.34 | 35.92 |  | 10.99 | 10.933 |
| Average Temp. | 12.52 | 13.61 | 14.99 | 16.29 | 16.59 | 18.08 | 15.32 | 10.75 | 11.88 | 9.94 |  | 10.93 | 12.357 |

| Cluster | Variables | | Interpretation |
| --- | --- | --- | --- |
| **In wet Season** | **In dry Season** |
| Cluster 1 | T-N, NH₄-N, NO₃-N, TDS | T-N, NH₄-N, NO₃-N, T-P | *Nutrient Enrichment Cluster*: Both seasons exhibit a tight grouping of nitrogen forms, indicating common sources (e.g., agricultural runoff, wastewater) and transformation processes. TDS joins this cluster in the wet season, while T-P becomes more central in the dry season—suggesting seasonally modulated nutrient coupling and possibly enhanced internal nutrient cycling during dry conditions. |
| Cluster 2 | T-P, SRP, SiO₂-Si, Fe, TDS | TDS, SRP, SiO₂-Si, Fe | *Geochemical and Sediment Influence Cluster:* This stable grouping across seasons reflects the persistent role of mineral weathering, sediment interaction, and catchment geology. In both periods, these parameters likely originate from erosion, volcanic soils, or internal loading from the lakebed, with dry season intensifying their concentrations due to evaporation and reduced dilution. |
| Cluster 3 | Chl-a, Tempe., DO, pH | Chl-a, Tempe., DO, pH | *Biophysical and Productivity Cluster:* The consistency of this cluster suggests a core ecological interaction between phytoplankton activity (Chl-a), thermal stratification (Temperature), photosynthetic oxygen production (DO), and pH modulation. Seasonal variation may influence the strength of these interactions, with light availability and grazing pressure likely affecting algal biomass. |

Table SM1 8. Grouping of Water Quality Parameters into Functional Clusters (Nutrient Enrichment, Geochemical/Sediment, and Biochemical/Productivity) for Wet and Dry Season Conditions.

| Season | Months | PNH4N | PNO3N | PTN | PSRP | PTP | PDO | PCI | Average PCI |
| --- | --- | --- | --- | --- | --- | --- | --- | --- | --- |
| Dry | February | 1.23 | 0.04 | 1.69 | 1.23 | 1.66 | 1.07 | 1.15 | 0.89 |
| March | 1.44 | 0.04 | 1.75 | 0.45 | 0.54 | 0.99 | 0.87 |
| April | 1.84 | 0.04 | 1.92 | 0.33 | 0.42 | 1.01 | 0.93 |
| June | 1.05 | 0.03 | 1.28 | 0.03 | 0.17 | 1.11 | 0.61 |
| Wet | July | 0.48 | 0.03 | 0.66 | 0.04 | 0.13 | 1.07 | 0.40 | 0.71 |
| August | 1.22 | 0.02 | 1.23 | 0.20 | 0.67 | 1.04 | 0.73 |
| September | 1.07 | 0.03 | 1.41 | 0.05 | 0.39 | 1.09 | 0.67 |
| October | 2.25 | 0.03 | 2.60 | 0.06 | 0.11 | 1.04 | 1.02 |
| Wet/dry | November | 0.99 | 0.3 | 1.31 | 0.36 | 0.55 | 1.02 | 0.72 | 0.75 |
| December | 1.02 | 0.36 | 1.36 | 0.3 | 0.5 | 0.99 | 0.72 |
| January | 1.33 | 0.3 | 0.95 | 0.5 | 0.41 | 0.7 | 1.04 |

Table SM1 9**.** Single and comprehensive pollution index of 11 months in some selected water quality parameters in dry and wet seasons of Lake Hashenge.


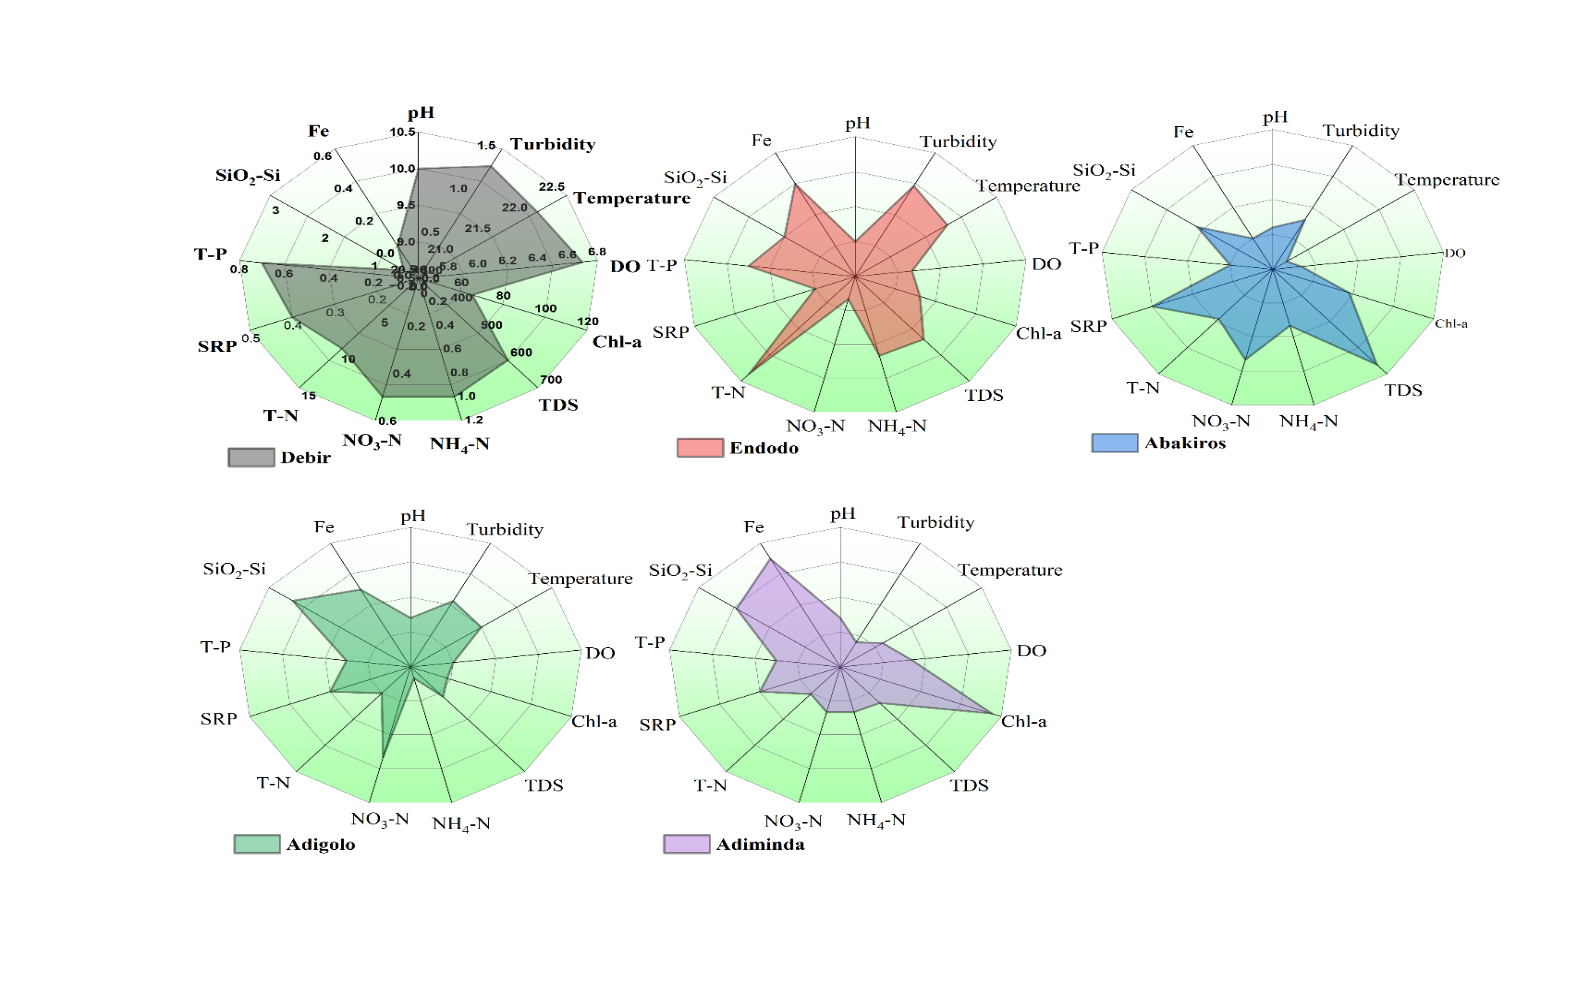

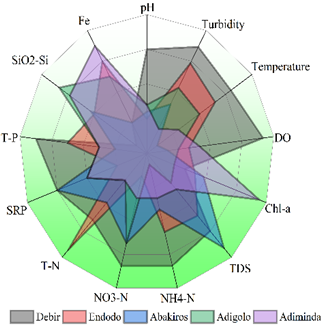


**SM-Figure 1.** Extended combined radar chart illustrating water quality parameters of Lake Hashenge across five sampling sites during the dry season. The chart offers a comprehensive view of spatial variations in water quality throughout the lake. Peaks and troughs in the chart indicate distinctive characteristics at each site—for example, Debir stands out in pH, T-N, T-P, and NH₄-N; Abakiros in SiO₂-Si, TDS, and turbidity; Adiminda in Chl-a; and Endodo in SRP and turbidity.


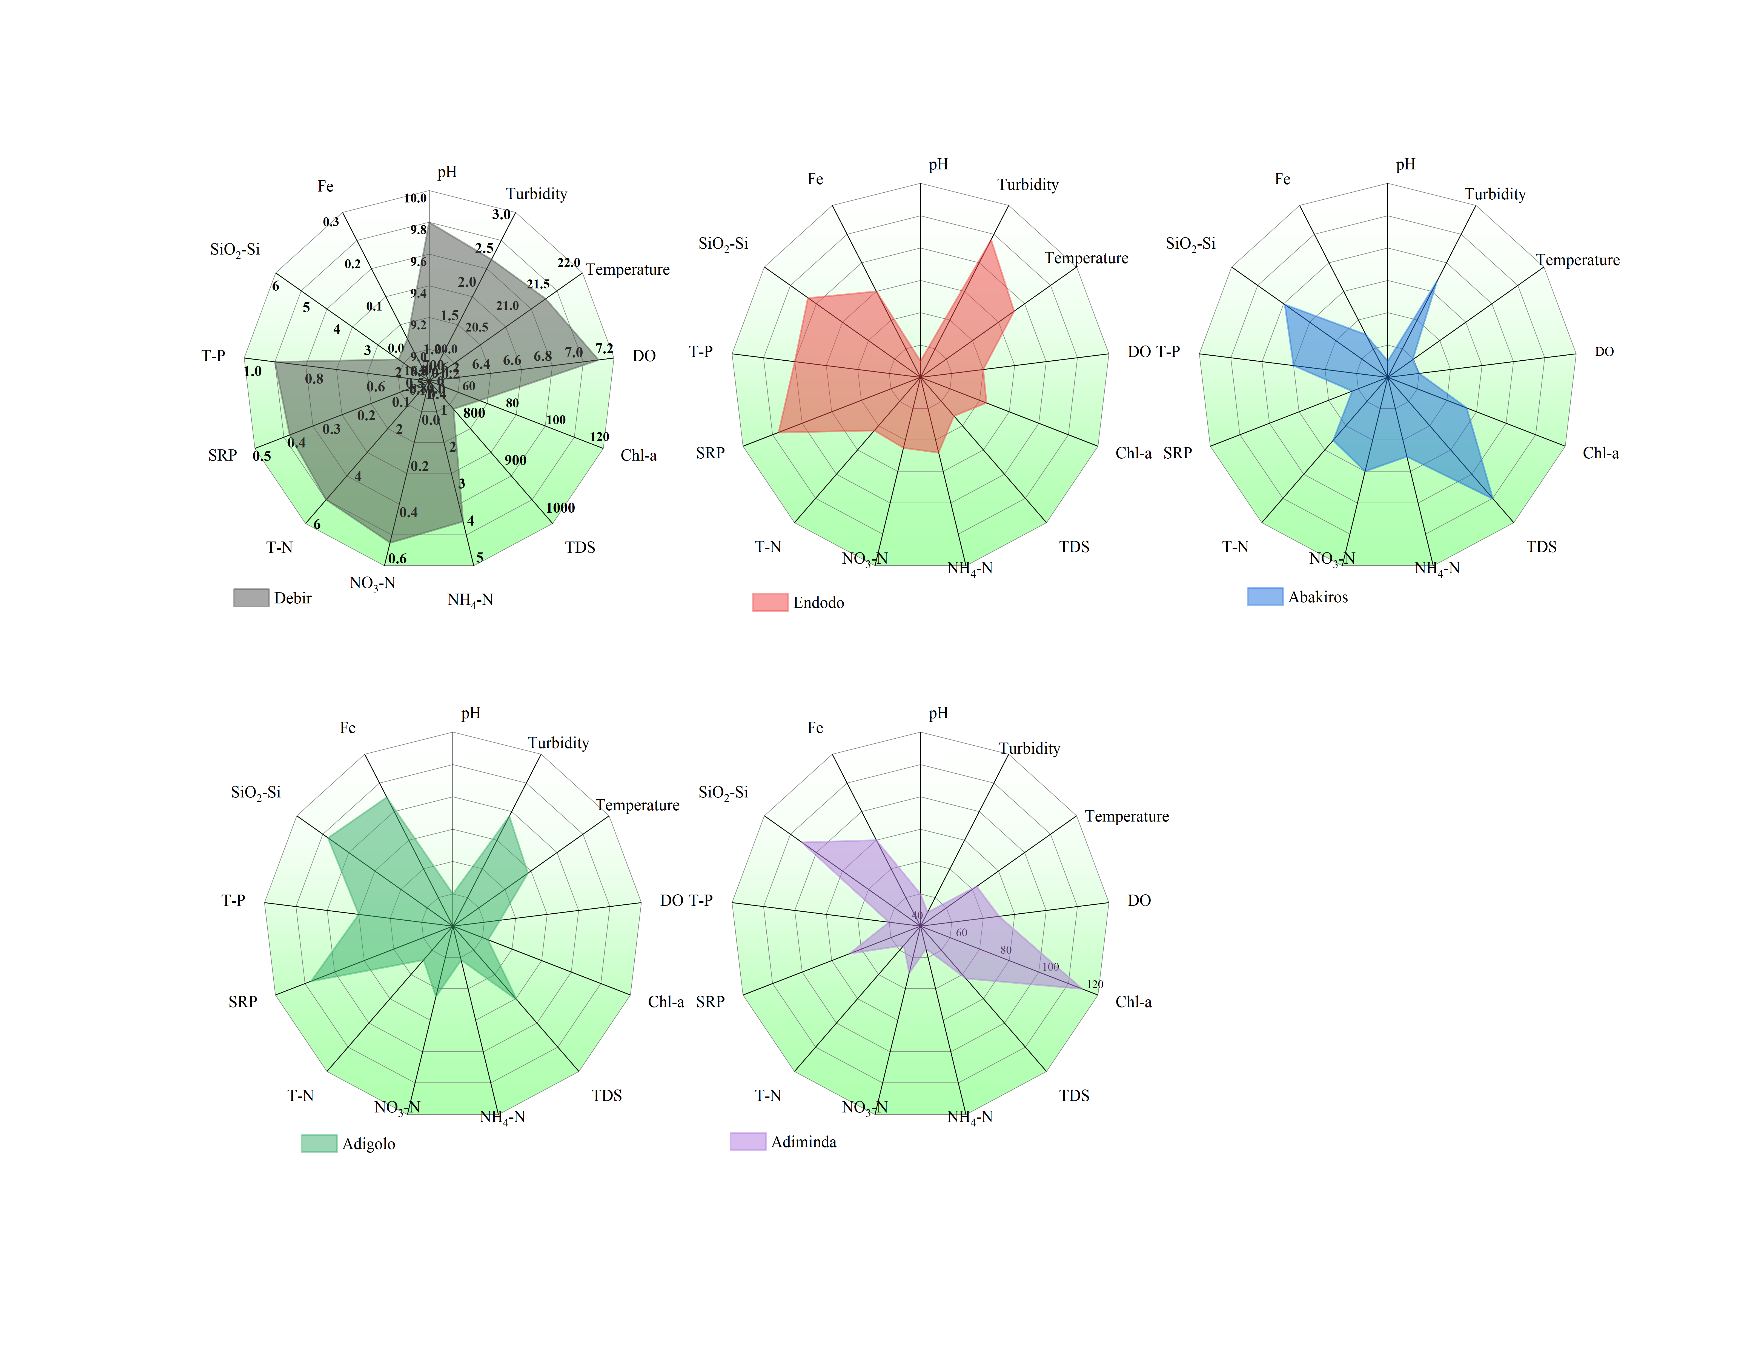

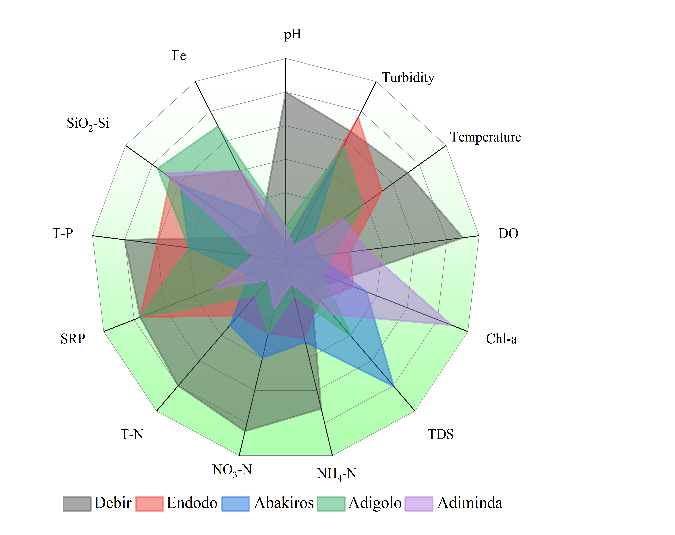


**SM-Figure 2.** Extended combined radar chart illustrating water quality parameters of Lake Hashenge across five sampling sites during the wet season. The chart offers a comprehensive view of spatial variations in water quality throughout the lake. Peaks and troughs in the chart indicate distinctive characteristics at each site—for example, Debir stands out in pH, T-N, T-P, and NH₄-N; Abakiros in SiO₂-Si, TDS, and turbidity; Adiminda in Chl-a; and Endodo in SRP and turbidity.

**Quality Indexes**

1. Dry Water Quality Index

Agricultural and grazing sites, such as Abakiros (PCI = 3.06) and Endedo (PCI = 2.67), had the greatest PCI values during the dry season because of soil erosion, fertilizer runoff, and animal waste (Singh et al, 2004). Conversely, Adigolo and Adiminda, which are distinguished by their steep slopes and poor nutrient input, displayed lower WQI scores in both seasons. This was ascribed to a decrease in human activity, notwithstanding the risks of erosion (Sharpley et al., 1994).

1. Wet Water Quality Index

The impact of hydrological processes on nutrient dynamics is demonstrated by the monthly PCI variation (table 11). February's peak PCI of 1.15 is explained by nutrient accumulation during dry months when evaporation exceeds inflow, which lowers dilution (Zhao et al., 2012). The early wet season runoff that brings nutrients into the lake is probably the cause of the October secondary peak of 1.02 (Baker, 2003). Even though there may be external loading, the lowest PCI values, which were obtained in June (0.61) and July (0.40), correspond with periods of peak rainfall, when enhanced inflow dilutes nutrient concentrations (Arreghini et al., 2005; Pionke et al., 1999; St. Pierre et al., 2021).

While the wet season seems to enhance water quality, low WQI scores may obscure true nutrient fluxes, as pollutants are diluted in a larger water volume instead of being minimized at the source. This aligns with the dilution effect seen in tropical and subtropical lakes (Ling et al., 2017; Zeinalzadeh & Rezaei, 2017). Consequently, effective watershed management should not depend solely on seasonal trends but must also tackle land use practices that lead to year-round nutrient loading.
